# Supplementary material for: Climate change has likely already affected global food production
Source: PubMed Central journal article supplement (PMC6544233; doi:10.1371/journal.pone.0217148), 2019-05-31

S9 Fig Change in crop yield due to only temperature climatological change (holding the precipitation variables at historical levels).

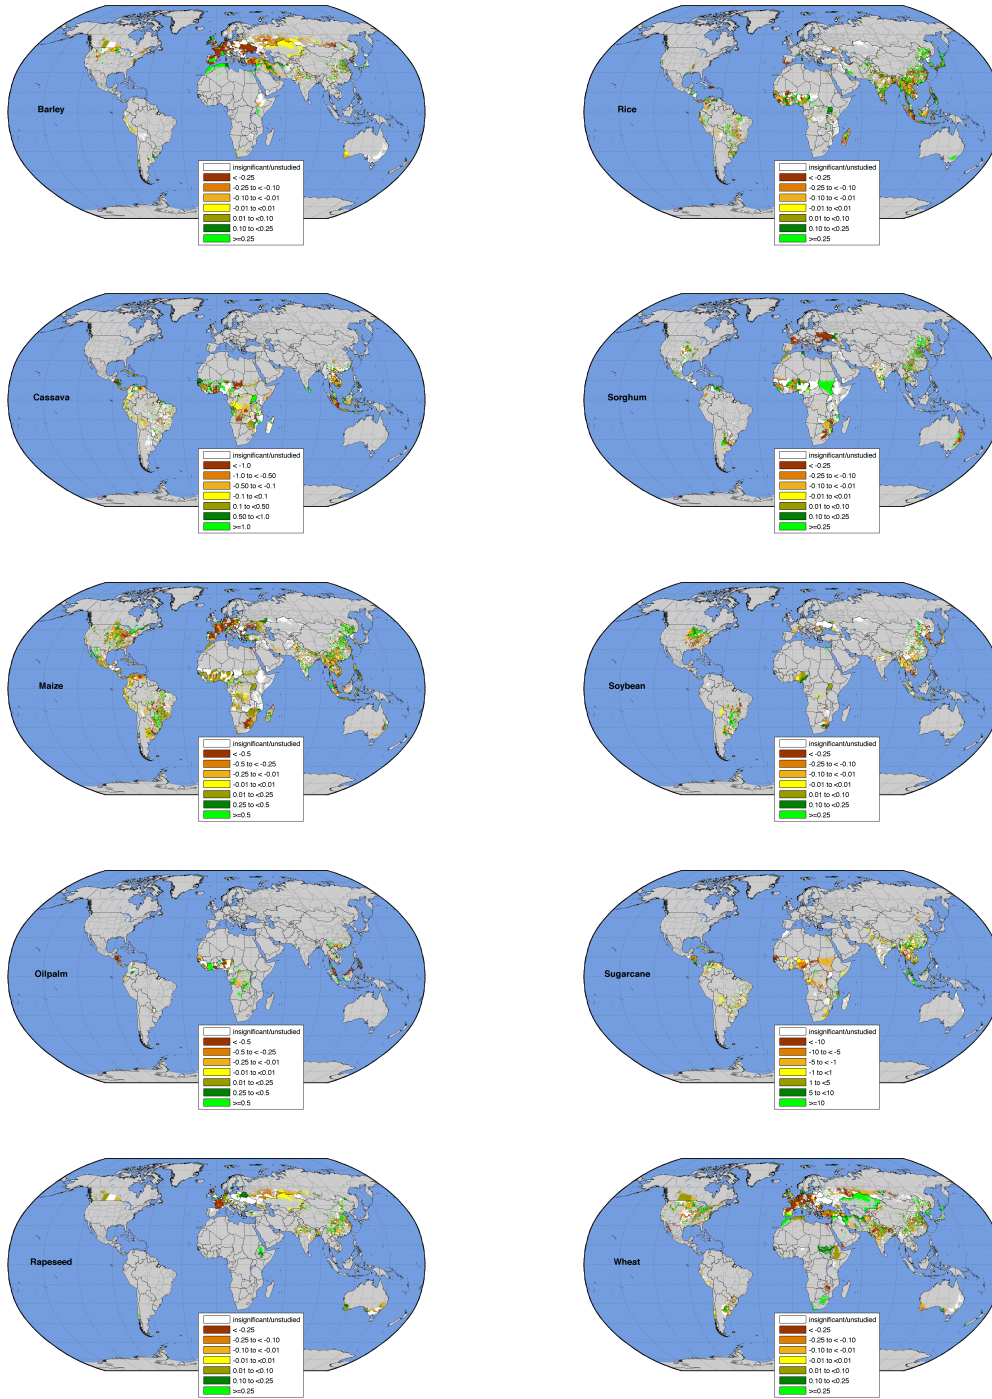

Supplement: pone.0217148.s010.pdf [file pone.0217148.s010.pdf]
