# Supplementary material for: Climate change has likely already affected global food production
Source: PubMed Central journal article supplement (PMC6544233; doi:10.1371/journal.pone.0217148), 2019-05-31
Supplement: pone.0217148.s018.pdf [file pone.0217148.s018.pdf]

S5 Table Percentage yield changed w.r.t historical global scale yield. (Yields under current T or P change are only over areas where change was detected and historical yields are over all cropped areas. Computed changes are not additive).

|           | Temperature change impact (%) | Precipitation change impact (%) |
|-----------|-------------------------------|---------------------------------|
| Barley    | -9.75                         | -2.05                           |
| Cassava   | -0.10                         | 0.22                            |
| Maize     | -0.30                         | 1.71                            |
| Oilpalm   | -15.92                        | -0.17                           |
| Rapeseed  | 4.23                          | 1.24                            |
| Rice      | 0.12                          | -0.03                           |
| Sorghum   | 8.81                          | -8.73                           |
| Soybean   | 4.04                          | 1.20                            |
| Sugarcane | 2.67                          | -0.43                           |
| Wheat     | 0.25                          | -0.74                           |
