# Supplementary material for: Climate change has likely already affected global food production
Source: PLOS journal article supplement (doi:10.1371/journal.pone.0217148), 2019-05-31
Supplement: S14 (10.1371/journal.pone.0217148.s014) [file journal.pone.0217148.s014]

S1 Table Climatological change in temperature and precipitation (values are averaged over all harvested croplands including those with insignificant climate change impact or unstudied due to data limitations). Change is the difference between monthly average current and historical value.

|                                                     | Crop      | Temperature change (°C) | Precipitation change (mm) |
|-----------------------------------------------------|-----------|-------------------------|---------------------------|
| Seasonal changes                                    |           |                         |                           |
| 1                                                   | Barley    | + 1.2                   | - 1.7                     |
| 2                                                   | Cassava   | + 0.8                   | + 3.1                     |
| 3                                                   | Maize     | + 0.8                   | + 3.0                     |
| 4                                                   | Oilpalm   | + 0.8                   | + 19.2                    |
| 5                                                   | Rapeseed  | + 1.0                   | + 0.6                     |
| 6                                                   | Rice      | + 0.7                   | - 0.3                     |
| 7                                                   | Sorghum   | + 0.7                   | + 9.3                     |
| 8                                                   | Soybean   | + 0.7                   | + 5.6                     |
| 9                                                   | Sugarcane | + 0.5                   | - 3.4                     |
| 10                                                  | Wheat     | + 0.9                   | - 0.7                     |
| Annual changes                                      |           |                         |                           |
| 1                                                   | Barley    | + 1.2                   | - 0.1                     |
| 2                                                   | Cassava   | + 0.8                   | + 1.8                     |
| 3                                                   | Maize     | + 1.0                   | + 1.4                     |
| 4                                                   | Oilpalm   | + 0.9                   | + 14.7                    |
| 5                                                   | Rapeseed  | + 0.8                   | - 2.6                     |
| 6                                                   | Rice      | + 0.7                   | - 0.2                     |
| 7                                                   | Sorghum   | + 0.8                   | + 3.0                     |
| 8                                                   | Soybean   | + 0.9                   | + 1.6                     |
| 9                                                   | Sugarcane | + 0.6                   | - 2.7                     |
| 10                                                  | Wheat     | + 1.0                   | - 1.6                     |
| Harvested hectares averaged over (million ha (Mha)) |           |                         |                           |
| 1                                                   | Barley    | 51.5                    |                           |
| 2                                                   | Cassava   | 16.9                    |                           |
| 3                                                   | Maize     | 133.2                   |                           |
| 4                                                   | Oilpalm   | 10.8                    |                           |
| 5                                                   | Rapeseed  | 23.9                    |                           |
| 6                                                   | Rice      | 141.8                   |                           |
| 7                                                   | Sorghum   | 40.1                    |                           |
| 8                                                   | Soybean   | 74.3                    |                           |
| 9                                                   | Sugarcane | 17.0                    |                           |
| 10                                                  | Wheat     | 196.8                   |                           |
