# Supplementary material for: Climate change has likely already affected global food production
Source: PLOS journal article supplement (doi:10.1371/journal.pone.0217148), 2019-05-31
Supplement: S19 (10.1371/journal.pone.0217148.s019) [file journal.pone.0217148.s019]

S6 Table Globally averaged Mean Square Error (MSE) (tons/ha) averaged over the harvested areas studied. Current yield refers to averaged yields over areas reported over years 2004-2008.

|           | MSE   | Current Yield |
|-----------|-------|---------------|
| Barley    | 0.11  | 2.59          |
| Cassava   | 1.72  | 12.15         |
| Maize     | 0.58  | 5.84          |
| Oil Palm  | 2.02  | 15.40         |
| Rapeseed  | 0.07  | 1.85          |
| Rice      | 0.20  | 4.36          |
| Sorghum   | 0.09  | 1.49          |
| Soybean   | 0.11  | 2.57          |
| Sugarcane | 41.01 | 65.71         |
| Wheat     | 0.13  | 3.05          |
